# Supplementary material for: Prognostic Value of Serum High Mobility Group Box 1 Protein and Histone H3 Levels in Patients with Disseminated Intravascular Coagulation: A Multicenter Prospective Cohort Study
Source: Research Square preprint supplement (doi:10.21203/rs.3.rs-1421441/v1), 2022-03-09
Supplement: Supplementary file 1 [file b71e57bd8cd46ad260a7e4dc.docx]

| **Supplementary Table S3. Underlying diseases of DIC** | |
| --- | --- |
|  | **Overall** |
| **Underlying diseases** | **n = 104** |
| Infections |  |
| Sepsis, n (%) | 17 (16) |
| Other severe infections, n (%) | 24 (23) |
| Hematopoietic malignancies |  |
| Acute leukemia, n (%) | 35 (34) |
| Malignant lymphoma, n (%) | 10 (9) |
| Other hematopoietic malignancies, n (%) | 5 (5) |
| Solid cancers, n (%) | 4 (4) |
| Tissue damage, n (%) | 4 (4) |
| Vascular-related diseases |  |
| Thoracic or abdominal aortic aneurysms, n (%) | 2 (2) |
| Other vascular-related diseases, n (%) | 3 (3) |

DIC, disseminated intravascular coagulation
